# Supplementary material for: The potential roles of gut microbiome in anal fistula
Source: PubMed Central journal article supplement (PMC10257611; doi:10.1186/s13568-023-01560-9), 2023-06-10
Supplement: 13568_2023_1560_MOESM1_ESM.pdf [file 13568_2023_1560_MOESM1_ESM.pdf]

Table S1. Sequencing information summary: number of raw reads, passed filtered reads, and after denoised reads and percentage of passed filtered reads and after denoised reads.

| Sample-id      | Group   | Raw reads | Passed filtered reads | After denoised reads |
|----------------|---------|-----------|-----------------------|----------------------|
| S20210127-2629 | Patient | 219100    | 192293(87.76)         | 189714(86.59)        |
| S20210127-2630 | Patient | 151276    | 132846(87.82)         | 130067(85.98)        |
| S20210127-2631 | Patient | 181439    | 155462(85.68)         | 152929(84.29)        |
| S20210127-2632 | Patient | 141146    | 123739(87.67)         | 119536(84.69)        |
| S20210127-2633 | Patient | 163585    | 138964(84.95)         | 136976(83.73)        |
| S20210127-2634 | Patient | 189124    | 166091(87.82)         | 163867(86.65)        |
| S20210127-2635 | Patient | 153569    | 134435(87.54)         | 132036(85.98)        |
| S20210127-2636 | Patient | 181916    | 159718(87.8)          | 156784(86.18)        |
| S20210127-2637 | Patient | 200107    | 175504(87.71)         | 173766(86.84)        |
| S20210127-2638 | Healthy | 188337    | 165833(88.05)         | 161790(85.90)        |
| S20210127-2639 | Healthy | 183163    | 160374(87.56)         | 157942(86.23)        |
| S20210127-2640 | Healthy | 139455    | 121772(87.32)         | 119153(85.44)        |
| S20210127-2641 | Healthy | 194648    | 170772(87.73)         | 167777(86.20)        |
| S20210127-2642 | Healthy | 236696    | 207029(87.47)         | 199203(84.16)        |
| S20210127-2643 | Healthy | 198546    | 175209(88.25)         | 170893(86.07)        |
| S20210127-2644 | Healthy | 183828    | 161409(87.8)          | 157883(85.89)        |
| S20210127-2645 | Healthy | 197639    | 170586(86.31)         | 168081(85.04)        |
| S20210127-2646 | Healthy | 184768    | 162559(87.98)         | 158855(85.98)        |
| S20210127-2647 | Healthy | 224600    | 188881(84.1)          | 186454(83.02)        |
| S20210127-2648 | Healthy | 164115    | 143950(87.71)         | 138527(84.41)        |
| S20210127-2649 | Healthy | 169142    | 146732(86.75)         | 144782(85.60)        |
| S20210127-2650 | Healthy | 258740    | 227739(88.02)         | 224336(86.70)        |
| S20210127-2651 | Healthy | 171590    | 149357(87.04)         | 146731(85.51)        |
| S20210127-2652 | Healthy | 132361    | 115946(87.6)          | 113647(85.86)        |
| S20210127-2653 | Healthy | 184320    | 162135(87.96)         | 159011(86.27)        |
| S20210127-2654 | Healthy | 159979    | 140086(87.57)         | 137243(85.79)        |
| S20210127-2655 | Healthy | 123446    | 107419(87.02)         | 105473(85.44)        |
| S20210127-2656 | Healthy | 184836    | 161527(87.39)         | 158758(85.89)        |
| S20210127-2657 | Healthy | 138656    | 123021(88.72)         | 121837(87.87)        |
| S20210127-2658 | Healthy | 145222    | 127417(87.74)         | 124258(85.56)        |
| S20210127-2659 | Healthy | 221011    | 194218(87.88)         | 190298(86.10)        |
| S20210127-2660 | Healthy | 189358    | 166161(87.75)         | 161813(85.45)        |
| S20210127-2661 | Patient | 124001    | 109556(88.35)         | 108095(87.17)        |
| S20210127-2662 | Patient | 169737    | 148715(87.61)         | 146530(86.33)        |
| S20210127-2663 | Patient | 212313    | 187122(88.13)         | 185169(87.22)        |
| S20210127-2664 | Patient | 207812    | 178508(85.9)          | 175376(84.39)        |
| S20210127-2665 | Patient | 187508    | 163497(87.19)         | 161121(85.93)        |
| S20210127-2666 | Patient | 190654    | 165297(86.7)          | 162710(85.34)        |
| S20210127-2667 | Patient | 173823    | 152874(87.95)         | 150529(86.60)        |
| S20210127-2668 | Patient | 227436    | 197000(86.62)         | 194382(85.47)        |
| S20210127-2669 | Patient | 142646    | 124521(87.29)         | 123244(86.40)        |

|                |         |        |               |               |
|----------------|---------|--------|---------------|---------------|
| S20210127-2670 | Patient | 193795 | 169194(87.31) | 166269(85.80) |
| S20210127-2671 | Patient | 271501 | 238079(87.69) | 235435(86.72) |
| S20210127-2672 | Patient | 154763 | 136367(88.11) | 133820(86.47) |
| S20210127-2673 | Patient | 120422 | 105661(87.74) | 102356(85.00) |
| S20210127-2674 | Patient | 198143 | 172544(87.08) | 170695(86.15) |
| S20210127-2675 | Patient | 227676 | 197948(86.94) | 195091(85.69) |
| S20210127-2676 | Patient | 191300 | 166794(87.19) | 164181(85.82) |
| S20210127-2677 | Patient | 207535 | 181614(87.51) | 178372(85.95) |
| S20210127-2678 | Patient | 236238 | 208184(88.12) | 206477(87.40) |
| S20210127-2679 | Patient | 240163 | 206210(85.86) | 203963(84.93) |
| S20210127-2680 | Patient | 176781 | 152019(85.99) | 149913(84.80) |
| S20210127-2681 | Patient | 227348 | 186984(82.25) | 183862(80.87) |
| S20210127-2682 | Patient | 143262 | 125785(87.8)  | 122867(85.76) |
| S20210127-2684 | Patient | 215989 | 190376(88.14) | 186718(86.45) |
| S20210127-2685 | Patient | 118285 | 103691(87.66) | 101653(85.94) |
| S20210127-2686 | Patient | 96524  | 83407(86.41)  | 82094(85.05)  |
| S20210127-2687 | Patient | 147916 | 128178(86.66) | 126346(85.42) |
| S20210127-2688 | Patient | 188112 | 162841(86.57) | 160413(85.28) |
| S20210127-2689 | Patient | 91281  | 79208(86.77)  | 76036(83.30)  |
| S20210127-2690 | Patient | 167326 | 145957(87.23) | 143938(86.02) |
| S20210127-2691 | Patient | 132094 | 115660(87.56) | 113503(85.93) |
| S20210127-2692 | Patient | 162279 | 141223(87.02) | 139585(86.02) |
| S20210127-2693 | Patient | 102236 | 89489(87.53)  | 87619(85.70)  |
| S20210127-2694 | Patient | 213158 | 185825(87.18) | 182781(85.75) |
| S20210127-2695 | Patient | 95940  | 84917(88.51)  | 82736(86.24)  |
| S20210127-2696 | Patient | 183518 | 161135(87.8)  | 158779(86.52) |
| S20210127-2697 | Patient | 151010 | 130553(86.45) | 128232(84.92) |
| S20210127-2698 | Patient | 175206 | 151262(86.33) | 148424(84.71) |
| S20210127-2699 | Patient | 130783 | 113945(87.13) | 112447(85.98) |
| S20210127-2700 | Patient | 142958 | 122535(85.71) | 120155(84.05) |
| S20210127-2701 | Healthy | 154746 | 135518(87.57) | 132222(85.44) |
| S20210127-2702 | Healthy | 149350 | 129838(86.94) | 126384(84.62) |
| S20210127-2703 | Healthy | 104515 | 91568(87.61)  | 90163(86.27)  |
| S20210127-2704 | Healthy | 148092 | 130020(87.8)  | 127775(86.28) |
| S20210127-2705 | Healthy | 220191 | 193897(88.06) | 191246(86.85) |
| S20210127-2706 | Healthy | 201409 | 176407(87.59) | 173036(85.91) |
| S20210127-2707 | Healthy | 159183 | 138522(87.02) | 136325(85.64) |
| S20210127-2708 | Healthy | 178717 | 152363(85.25) | 151092(84.54) |
| S20210127-2709 | Healthy | 192991 | 168462(87.29) | 164736(85.36) |
| S20210127-2710 | Healthy | 174467 | 152629(87.48) | 148367(85.04) |
| S20210127-2711 | Healthy | 135081 | 118347(87.61) | 116554(86.28) |
| S20210127-2712 | Healthy | 168884 | 147419(87.29) | 145720(86.28) |
| S20210127-2713 | Healthy | 194643 | 170567(87.63) | 166720(85.65) |
| S20210127-2714 | Healthy | 127044 | 110091(86.66) | 108222(85.18) |

|                |         |        |               |               |
|----------------|---------|--------|---------------|---------------|
| S20210127-2715 | Healthy | 151870 | 133047(87.61) | 131247(86.42) |
| S20210127-2716 | Healthy | 179246 | 157551(87.9)  | 152632(85.15) |
| S20210127-2717 | Healthy | 150661 | 131519(87.29) | 129279(85.81) |
| S20210127-2718 | Healthy | 156977 | 137038(87.3)  | 130508(83.14) |
| S20210127-2719 | Healthy | 80452  | 70356(87.45)  | 67728(84.18)  |
| S20210127-2720 | Healthy | 123530 | 108508(87.84) | 107425(86.96) |
| S20210127-2721 | Healthy | 90557  | 75765(83.67)  | 74162(81.90)  |
| S20210127-2722 | Healthy | 174735 | 153788(88.01) | 150098(85.90) |
| S20210127-2723 | Healthy | 133674 | 117327(87.77) | 113769(85.11) |
| S20210127-2724 | Healthy | 135612 | 118943(87.71) | 116693(86.05) |
| S20210127-2725 | Healthy | 141911 | 124284(87.58) | 122027(85.99) |
| S20210127-2726 | Healthy | 185759 | 163886(88.23) | 161738(87.07) |
| S20210127-2727 | Healthy | 80297  | 70128(87.34)  | 67179(83.66)  |

Table S2. List of the 5 biomarkers in the optimal marker set

*s\_\_clostridioforme*  
*s\_\_bartlettii*  
*g\_\_Corynebacterium*  
*s\_\_orale*  
*g\_\_Anaerotruncus*

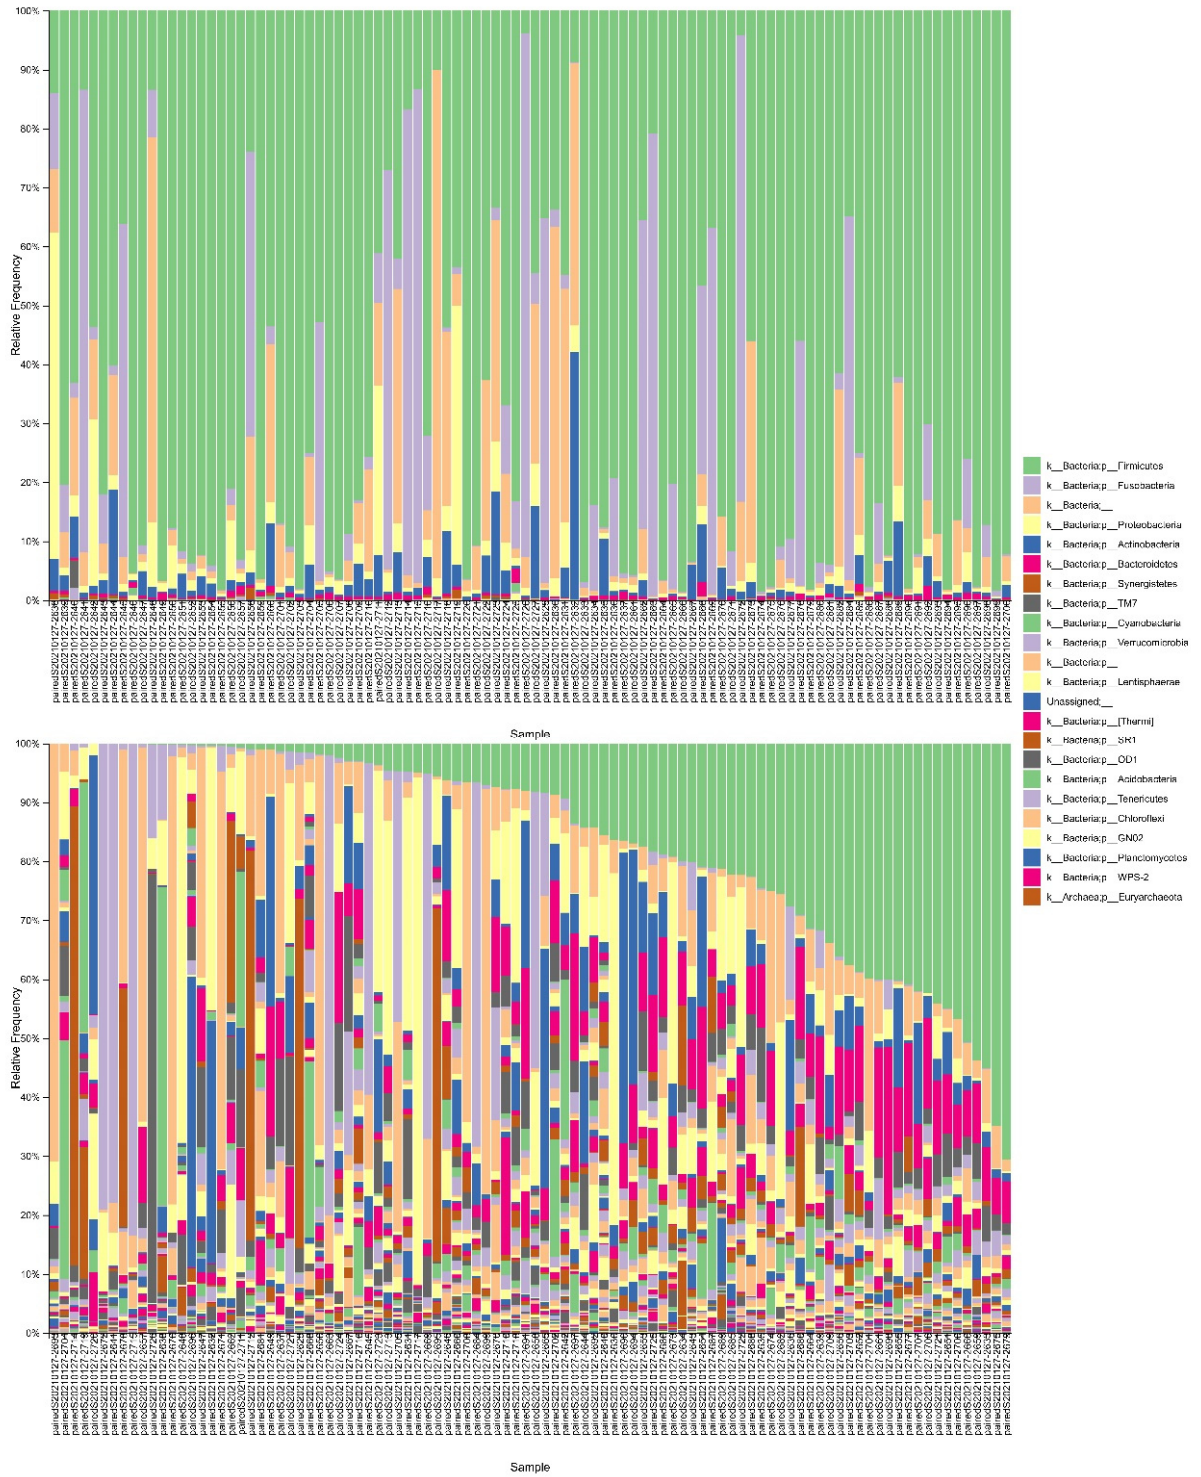

Figure S1. Bacterial abundance and distribution in each sample.
